# Supplementary material for: Impact of Different Durations of Fasting on Intestinal Autophagy and Serum Metabolome in Broiler Chicken
Source: MDPI journal article supplement (doi:10.3390/ani11082183), 2021-07-23
Supplement: s1 [file s1]

**Table S1** Common changed metabolites in different fasting groups

---

Metabolites

(4E,7E,10Z,13E,16E,19E)-docosa-4,7,10,13,16,19-hexaenoic acid

1-(8-[5]-ladderane-octanyl)-2-(8-[3]-ladderane-octanyl)-sn-glycero-3-phospho-(1'-sn-glycerol)

11-Hydroxy-9-tridecenoic acid

3-Hydroxymelatonin

4-ethylphenylsulfate

4-vinylphenol Sulfate

Acrimarine J

Amoxapine

Apigenin 7-sulfate

Captopril

Dihydronaringenin-O-sulphate

Ferulic acid 4-sulfate

Histidiny-Lysine

LysoPC(20:4(5Z,8Z,11Z,14Z))

LysoPC(22:5(4Z,7Z,10Z,13Z,16Z))

LysoPC(22:6(4Z,7Z,10Z,13Z,16Z,19Z))

LysoPE(22:4(7Z,10Z,13Z,16Z)/0:0)

LysoPE(22:6(4Z,7Z,10Z,13Z,16Z,19Z)/0:0)

Naringenin 4'-O-glucuronide

N-linoleoyl taurine

Oleoyl Serotonin

PE(18:3(9Z,12Z,15Z)/P-18:0)

Tauroursodeoxycholic acid

---

**Table S2** Changed serum metabolites concentration after different fasting duration

| Class       | Sub class                  | Matabolites                                    | Abundance |        |        |        |        |        |
|-------------|----------------------------|------------------------------------------------|-----------|--------|--------|--------|--------|--------|
|             |                            |                                                | CT        | FH12   | FH24   | FH36   | FH48   | FH72   |
| Fatty Acyls | Saturated fatty acid       | Tridecanoic acid                               | 0.0094    | 0.0414 | 0.0179 | 0.0066 | 0.0064 | 0.0051 |
| Fatty Acyls | Saturated fatty acid       | 18-oxo-nonadecanoic acid                       | 0.0063    | 0.0692 | 0.0285 | 0.0146 | 0.0102 | 0.0094 |
| Fatty Acyls | Saturated fatty acid       | 6,8-dihydroxy-octanoic acid                    | 0.0332    | 0.0689 | 0.0405 | 0.0184 | 0.0200 | 0.0129 |
| Fatty Acyls | Saturated fatty acid       | Tetradecanedioic acid                          | 0.0395    | 0.2065 | 0.1008 | 0.0458 | 0.0432 | 0.0328 |
| Fatty Acyls | Saturated fatty acid       | Hexadecanedioic acid                           | 0.1928    | 1.9638 | 0.6403 | 0.2552 | 0.2600 | 0.2165 |
| Fatty Acyls | Saturated fatty acid       | DL-2-hydroxy stearic acid                      | 0.0620    | 0.3351 | 0.1434 | 0.1041 | 0.1076 | 0.0888 |
| Fatty Acyls | Polyunsaturated fatty acid | 13-Oxo-9,14-tridecadienoic acid                | 0.0031    | 0.0319 | 0.0150 | 0.0033 | 0.0049 | 0.0019 |
| Fatty Acyls | Polyunsaturated fatty acid | 15:6(2Z,4E,6Z,8E,12E,14)(6Me,8Me,10Me[S],13Me) | 0.0004    | 0.0611 | 0.0064 | 0.0012 | 0.0004 | 0.0006 |
| Fatty Acyls | Polyunsaturated fatty acid | 7,10-Heptadecadiynoic acid                     | 0.0475    | 0.0219 | 0.0436 | 0.0564 | 0.0653 | 0.0580 |
| Fatty Acyls | Polyunsaturated fatty acid | 19,20-DiHDP A                                  | 0.0014    | 0.1486 | 0.0120 | 0.0035 | 0.0028 | 0.0022 |
| Fatty Acyls | Polyunsaturated fatty acid | DPA(22-4)                                      | 0.0213    | 0.1018 | 0.0920 | 0.0741 | 0.0763 | 0.0651 |
| Fatty Acyls | Polyunsaturated fatty acid | DPA (22n-6)                                    | 0.0810    | 0.2017 | 0.1543 | 0.1259 | 0.1353 | 0.1350 |
| Fatty Acyls | Polyunsaturated fatty acid | Adrenic Acid                                   | 0.0381    | 0.0903 | 0.0830 | 0.0711 | 0.0727 | 0.0600 |
| Fatty Acyls | Polyunsaturated fatty acid | Cyclohexaneundecanoic acid                     | 0.1289    | 1.9397 | 0.3493 | 0.1622 | 0.1472 | 0.1310 |
| Fatty Acyls | Polyunsaturated fatty acid | 12,14-Pentacosadiynoic acid                    | 5.4099    | 4.3068 | 3.4115 | 2.6534 | 2.0015 | 1.8616 |
| Fatty Acyls | Polyunsaturated fatty acid | 5,6-dehydro Arachidonic Acid                   | 0.0475    | 0.1499 | 0.1155 | 0.0837 | 0.0591 | 0.0383 |
| Fatty Acyls | Polyunsaturated fatty acid | 4,7,10,13,16,19-DHA                            | 0.2745    | 0.6964 | 0.6692 | 0.6264 | 0.7207 | 0.7474 |
| Fatty Acyls | Polyunsaturated fatty acid | 5(Z),8(Z),14(Z)-Eicosatrienoic Acid            | 0.0262    | 0.0587 | 0.0264 | 0.0185 | 0.0160 | 0.0100 |
| Fatty Acyls | Polyunsaturated fatty acid | (±)20-HDoHE                                    | 0.0003    | 0.0375 | 0.0052 | 0.0010 | 0.0008 | 0.0006 |
| Fatty Acyls | Monounsaturated fatty acid | Axillarenic acid                               | 0.0039    | 0.0289 | 0.0154 | 0.0110 | 0.0105 | 0.0075 |
| Fatty Acyls | Monounsaturated fatty acid | 16-heptadecynoic acid                          | 0.4726    | 3.0969 | 0.5236 | 0.1799 | 0.1801 | 0.1513 |
| Fatty Acyls | Monounsaturated fatty acid | 11-Hydroxy-9-tridecenoic acid                  | 0.2275    | 0.1110 | 0.0568 | 0.0362 | 0.0391 | 0.0376 |
| Fatty Acyls | Monounsaturated fatty acid | Elaidic Acid                                   | 0.0845    | 0.0329 | 0.0606 | 0.0879 | 0.0881 | 0.0758 |
| Fatty Acyls | Monounsaturated fatty acid | 6-nonynoic acid                                | 0.0819    | 0.2979 | 0.1897 | 0.0725 | 0.0794 | 0.0794 |
| Fatty Acyls | Monounsaturated fatty acid | 12-tridecynoic acid                            | 0.0460    | 0.0981 | 0.0415 | 0.0121 | 0.0102 | 0.0060 |
| Fatty Acyls | Monounsaturated fatty acid | 10-tridecynoic acid                            | 0.0249    | 0.1124 | 0.0532 | 0.0165 | 0.0153 | 0.0111 |
| Fatty Acyls | Docosanoids                | 7,8-epoxy-17S-HDHA                             | 0.0001    | 0.1471 | 0.0157 | 0.0034 | 0.0018 | 0.0016 |
| Fatty Acyls | Docosanoids                | 14S,21S-diHDHA                                 | 0.0045    | 0.2566 | 0.0184 | 0.0035 | 0.0023 | 0.0014 |
| Fatty Acyls | Fatty acid esters          | Diethyl decanedioate                           | 0.2513    | 0.2085 | 0.3095 | 0.2743 | 0.1572 | 0.0192 |
| Fatty Acyls | Fatty acyl glycosides      | 4-Methoxybenzenepropanol 1-(2-sulfoglucoside)  | 0.0159    | 0.0446 | 0.0567 | 0.0329 | 0.0318 | 0.0269 |
| Fatty Acyls | Fatty acyl glycosides      | beta-D-glucopyranose                           | 0.1841    | 0.1866 | 0.1581 | 0.3669 | 0.3729 | 0.5214 |
| Fatty Acyls | Fatty alcohols             | 2,6-Nonadien-1-ol                              | 0.0463    | 0.0175 | 0.0327 | 0.0455 | 0.0447 | 0.0386 |
| Fatty Acyls | Fatty aldehydes            | 5,10-pentadecadienal                           | 0.0052    | 0.0606 | 0.0427 | 0.0282 | 0.0292 | 0.0177 |
| Fatty Acyls | Fatty amides               | S-aminomethyldihydrolipoamide                  | 0.0287    | 0.0194 | 0.0312 | 0.0689 | 0.1028 | 0.0861 |
| Fatty Acyls | Fatty amides               | N-linoleoyl taurine                            | 0.0400    | 0.3483 | 0.2752 | 0.1867 | 0.1803 | 0.1393 |
| Fatty Acyls | Fatty amides               | N-arachidonoyl taurine                         | 0.0125    | 0.0586 | 0.0495 | 0.0373 | 0.0351 | 0.0294 |
| Fatty Acyls | Fatty amides               | N-oleoyl phenylalanine                         | 0.0234    | 0.0932 | 0.0772 | 0.0595 | 0.0676 | 0.0372 |
| Fatty Acyls | Fatty amides               | N-oleoyl isoleucine                            | 0.0464    | 0.1619 | 0.1520 | 0.1490 | 0.1830 | 0.1009 |

|                      |                                |                                             |         |         |         |         |         |         |
|----------------------|--------------------------------|---------------------------------------------|---------|---------|---------|---------|---------|---------|
| Fatty Acyls          | Fatty amides                   | (±)12(13)-EpOME                             | 0.4460  | 0.3859  | 0.3374  | 0.2981  | 0.2686  | 0.1815  |
| Fatty Acyls          | Fatty amides                   | Octadecanamide                              | 0.0651  | 0.1341  | 0.0874  | 0.0721  | 0.0697  | 0.0815  |
| Fatty Acyls          | Fatty esters                   | 14,14,14-Trifluoro-11E-tetradecenyl acetate | 0.0011  | 0.0269  | 0.0078  | 0.0023  | 0.0023  | 0.0026  |
| Fatty Acyls          | Octadecanoids                  | Tuberonic acid                              | 0.0179  | 0.1188  | 0.0308  | 0.0118  | 0.0097  | 0.0093  |
| Fatty Acyls          | Octadecanoids                  | 17-hydroxy-linolenic acid                   | 0.0402  | 0.0078  | 0.0040  | 0.0024  | 0.0030  | 0.0022  |
| Fatty Acyls          | Octadecanoids                  | 18-hydroxy stearic acid                     | 0.0550  | 0.2166  | 0.1500  | 0.1166  | 0.1221  | 0.1021  |
| Fatty Acyls          | Lineolic acids and derivatives | (±)9-HODE                                   | 0.0529  | 0.2238  | 0.1250  | 0.0658  | 0.0563  | 0.0455  |
| Fatty Acyls          | Eicosanoids                    | Dinor-PGE2                                  | 0.0008  | 0.0314  | 0.0058  | 0.0013  | 0.0013  | 0.0011  |
| Fatty Acyls          | Eicosanoids                    | 2,3-dinor-11beta-PGF2alpha                  | 0.0899  | 0.7496  | 0.1686  | 0.0516  | 0.0454  | 0.0364  |
| Fatty Acyls          | Eicosanoids                    | 15d PGD2                                    | 0.0113  | 0.5736  | 0.0849  | 0.0281  | 0.0244  | 0.0199  |
| Fatty Acyls          | Eicosanoids                    | 17,18-DiHETE                                | 0.0052  | 0.2614  | 0.0169  | 0.0038  | 0.0025  | 0.0011  |
| Fatty Acyls          | Eicosanoids                    | 13,14-Dihydro PGF-1a                        | 0.0264  | 0.1635  | 0.0182  | 0.0090  | 0.0080  | 0.0072  |
| Fatty Acyls          | Eicosanoids                    | 12-epi Leukotriene B3                       | 0.0012  | 0.0675  | 0.0040  | 0.0010  | 0.0005  | 0.0003  |
| Fatty Acyls          | Eicosanoids                    | (±)15-HETE                                  | 0.0053  | 0.0314  | 0.0171  | 0.0124  | 0.0122  | 0.0060  |
| Glycerophospholipids | Glycerophosphocholines         | PC(16:0/2:0)                                | 0.4843  | 0.5436  | 0.1971  | 0.1967  | 0.2056  | 0.1486  |
| Glycerophospholipids | Glycerophosphocholines         | PC(15:0/18:1(11Z))                          | 0.0010  | 0.0384  | 0.0159  | 0.0067  | 0.0072  | 0.0050  |
| Glycerophospholipids | Glycerophosphocholines         | PC(15:1(9Z)/0:0)                            | 0.1205  | 0.1451  | 0.0599  | 0.0501  | 0.0568  | 0.0412  |
| Glycerophospholipids | Glycerophosphocholines         | PC(18:1(17Z)/18:1(17Z))                     | 16.6429 | 13.8711 | 13.8087 | 11.9087 | 9.8205  | 6.9538  |
| Glycerophospholipids | Glycerophosphocholines         | PC(18:1(9E)/2:0)                            | 0.7671  | 0.7094  | 0.4555  | 0.4636  | 0.4246  | 0.3212  |
| Glycerophospholipids | Glycerophosphocholines         | PC(P-20:0/14:1(9Z))                         | 0.0494  | 0.0339  | 0.0736  | 0.1393  | 0.2012  | 0.2868  |
| Glycerophospholipids | Glycerophosphocholines         | PC(14:0/17:2(9Z,12Z))                       | 0.0680  | 0.0437  | 0.0292  | 0.0240  | 0.0143  | 0.0092  |
| Glycerophospholipids | Glycerophosphocholines         | PC(14:0/22:5(7Z,10Z,13Z,16Z,19Z))           | 2.3469  | 2.3051  | 2.0354  | 1.8337  | 1.5271  | 1.1541  |
| Glycerophospholipids | Glycerophosphocholines         | PC(16:0/18:2(9Z,12Z))                       | 0.5211  | 0.4177  | 0.3841  | 0.3297  | 0.3393  | 0.1610  |
| Glycerophospholipids | Glycerophosphocholines         | PC(16:0/18:3(9Z,12Z,15Z))                   | 0.1619  | 0.1604  | 0.1068  | 0.0748  | 0.0459  | 0.0269  |
| Glycerophospholipids | Glycerophosphocholines         | PC(17:2(9Z,12Z)/0:0)                        | 0.2698  | 0.2749  | 0.1979  | 0.1820  | 0.1635  | 0.1170  |
| Glycerophospholipids | Glycerophosphocholines         | PC(19:3(10Z,13Z,16Z)/0:0)                   | 0.0589  | 0.0740  | 0.0257  | 0.0194  | 0.0164  | 0.0131  |
| Glycerophospholipids | Glycerophosphocholines         | PC(20:1(11Z)/18:3(9Z,12Z,15Z))              | 27.5146 | 18.0630 | 43.7408 | 54.4455 | 67.0540 | 60.9672 |
| Glycerophospholipids | Glycerophosphocholines         | PC(20:2(11Z,14Z)/P-18:1(11Z))               | 0.0104  | 0.0059  | 0.0200  | 0.0387  | 0.0599  | 0.0706  |
| Glycerophospholipids | Glycerophosphocholines         | LysoPC(14:0)                                | 0.9985  | 0.9500  | 0.5028  | 0.5466  | 0.5411  | 0.4115  |
| Glycerophospholipids | Glycerophosphocholines         | LysoPC(15:0)                                | 0.0623  | 0.0267  | 0.0267  | 0.0335  | 0.0390  | 0.0323  |
| Glycerophospholipids | Glycerophosphocholines         | LysoPC(O-18:0)                              | 0.1952  | 0.1894  | 0.2047  | 0.2750  | 0.3147  | 0.4152  |
| Glycerophospholipids | Glycerophosphocholines         | LysoPC(P-18:0)                              | 0.0532  | 0.0446  | 0.0416  | 0.0561  | 0.0637  | 0.1072  |
| Glycerophospholipids | Glycerophosphocholines         | LysoPC(16:1(9Z))                            | 9.7593  | 12.9896 | 5.7182  | 5.2958  | 5.3413  | 3.8474  |
| Glycerophospholipids | Glycerophosphocholines         | LysoPC(18:2(9Z,12Z))                        | 35.6570 | 36.0840 | 26.2554 | 24.5911 | 21.5943 | 15.7535 |
| Glycerophospholipids | Glycerophosphocholines         | LysoPC(18:3(6Z,9Z,12Z))                     | 2.0171  | 3.2735  | 1.8945  | 1.6714  | 1.3750  | 0.8034  |
| Glycerophospholipids | Glycerophosphocholines         | LysoPC(18:3(9Z,12Z,15Z))                    | 0.1196  | 0.1070  | 0.0924  | 0.1030  | 0.0982  | 0.0575  |
| Glycerophospholipids | Glycerophosphocholines         | LysoPC(18:4(6Z,9Z,12Z,15Z))                 | 0.0008  | 0.0302  | 0.0101  | 0.0041  | 0.0005  | 0.0000  |
| Glycerophospholipids | Glycerophosphocholines         | LysoPC(20:1(11Z))                           | 0.3546  | 0.4283  | 0.1904  | 0.1672  | 0.1649  | 0.1749  |
| Glycerophospholipids | Glycerophosphocholines         | LysoPC(20:3(5Z,8Z,11Z))                     | 8.2626  | 9.9720  | 4.0042  | 3.0921  | 2.5756  | 2.1759  |
| Glycerophospholipids | Glycerophosphocholines         | LysoPC(20:4(5Z,8Z,11Z,14Z))                 | 11.2274 | 25.1516 | 28.8086 | 31.5943 | 33.2249 | 30.9704 |
| Glycerophospholipids | Glycerophosphocholines         | LysoPC(20:4(8Z,11Z,14Z,17Z))                | 0.9907  | 1.1725  | 1.8625  | 2.5000  | 3.0368  | 2.8477  |
| Glycerophospholipids | Glycerophosphocholines         | LysoPC(20:5(5Z,8Z,11Z,14Z,17Z))             | 2.0177  | 4.8540  | 4.0495  | 3.8667  | 2.8558  | 1.4127  |
| Glycerophospholipids | Glycerophosphocholines         | LysoPC(22:4(7Z,10Z,13Z,16Z))                | 1.2996  | 1.8002  | 1.6140  | 2.0099  | 2.8871  | 4.0731  |

|                                  |                                      |                                                 |         |        |        |        |        |        |
|----------------------------------|--------------------------------------|-------------------------------------------------|---------|--------|--------|--------|--------|--------|
| Glycerophospholipids             | Glycerophosphocholines               | LysoPC(22:5(4Z,7Z,10Z,13Z,16Z))                 | 1.4758  | 3.8860 | 4.5343 | 6.0916 | 8.2384 | 9.9825 |
| Glycerophospholipids             | Glycerophosphocholines               | LysoPC(22:6(4Z,7Z,10Z,13Z,16Z,19Z))             | 2.4891  | 5.7725 | 5.9374 | 7.3494 | 9.2254 | 9.2175 |
| Glycerophospholipids             | Glycerophosphoethanolamines          | PE(8:0/8:0)                                     | 0.0143  | 0.0421 | 0.0344 | 0.0362 | 0.0416 | 0.0329 |
| Glycerophospholipids             | Glycerophosphoethanolamines          | PE(18:1(9Z)/0:0)                                | 8.6887  | 8.2277 | 4.3154 | 3.5879 | 2.9036 | 1.8358 |
| Glycerophospholipids             | Glycerophosphoethanolamines          | PE(18:2(9Z,12Z)/P-18:1(11Z))                    | 0.0491  | 0.0203 | 0.0198 | 0.0237 | 0.0289 | 0.0235 |
| Glycerophospholipids             | Glycerophosphoethanolamines          | PE(18:3(9Z,12Z,15Z)/P-18:0)                     | 0.0527  | 0.1337 | 0.1382 | 0.1421 | 0.1422 | 0.1128 |
| Glycerophospholipids             | Glycerophosphoethanolamines          | LysoPE(16:1(9Z)/0:0)                            | 0.7926  | 0.5304 | 0.1221 | 0.1074 | 0.0961 | 0.0659 |
| Glycerophospholipids             | Glycerophosphoethanolamines          | LysoPE(18:2(9Z,12Z)/0:0)                        | 10.7239 | 6.9947 | 4.3533 | 3.8424 | 3.2108 | 1.9211 |
| Glycerophospholipids             | Glycerophosphoethanolamines          | LysoPE(18:3(6Z,9Z,12Z)/0:0)                     | 0.5050  | 0.5754 | 0.3246 | 0.2568 | 0.1950 | 0.0931 |
| Glycerophospholipids             | Glycerophosphoethanolamines          | LysoPE(20:1(11Z)/0:0)                           | 0.0811  | 0.0471 | 0.0163 | 0.0132 | 0.0142 | 0.0132 |
| Glycerophospholipids             | Glycerophosphoethanolamines          | LysoPE(20:2(11Z,14Z)/0:0)                       | 0.4087  | 0.4541 | 0.2088 | 0.1866 | 0.2158 | 0.2136 |
| Glycerophospholipids             | Glycerophosphoethanolamines          | LysoPE(20:3(11Z,14Z,17Z)/0:0)                   | 1.3755  | 1.1062 | 0.3582 | 0.2683 | 0.2459 | 0.1753 |
| Glycerophospholipids             | Glycerophosphoethanolamines          | LysoPE(20:5(5Z,8Z,11Z,14Z,17Z)/0:0)             | 0.5393  | 0.7595 | 0.5494 | 0.5708 | 0.4688 | 0.2318 |
| Glycerophospholipids             | Glycerophosphoethanolamines          | LysoPE(22:4(7Z,10Z,13Z,16Z)/0:0)                | 0.0708  | 0.1656 | 0.2037 | 0.2281 | 0.2446 | 0.2231 |
| Glycerophospholipids             | Glycerophosphoethanolamines          | LysoPE(22:5(7Z,10Z,13Z,16Z,19Z)/0:0)            | 0.0343  | 0.0344 | 0.0513 | 0.0716 | 0.1093 | 0.0984 |
| Glycerophospholipids             | Glycerophosphoethanolamines          | LysoPE(22:6(4Z,7Z,10Z,13Z,16Z,19Z)/0:0)         | 1.9582  | 4.3011 | 3.9676 | 4.1704 | 5.3221 | 4.0351 |
| Glycerophospholipids             | Glycerophosphates                    | PA(6:0/6:0)                                     | 0.0008  | 0.0264 | 0.0556 | 0.0857 | 0.0767 | 0.1088 |
| Glycerophospholipids             | Glycerophosphates                    | LPA(0:0/18:2(9Z,12Z))                           | 0.2710  | 0.2850 | 0.2002 | 0.2256 | 0.2054 | 0.1211 |
| Glycerophospholipids             | Glycerophosphates                    | 1-eicosapentaenoyl-glycero-3-phosphate          | 0.0696  | 0.2211 | 0.1497 | 0.1325 | 0.0844 | 0.0336 |
| Glycerophospholipids             | Glycerophosphoinositols              | PI(16:1(9Z)/0:0)                                | 0.0826  | 0.0618 | 0.0266 | 0.0264 | 0.0210 | 0.0129 |
| Glycerophospholipids             | Glycerophosphoinositols              | PI(18:3(6Z,9Z,12Z)/0:0)                         | 0.0277  | 0.0600 | 0.0581 | 0.0617 | 0.0339 | 0.0178 |
| Glycerophospholipids             | Glycerophosphoinositols              | PI(20:3(8Z,11Z,14Z)/0:0)                        | 0.1981  | 0.2135 | 0.1400 | 0.1345 | 0.0912 | 0.0603 |
| Glycerophospholipids             | Glycerophosphoinositols              | PI(20:5(5Z,8Z,11Z,14Z,17Z)/0:0)                 | 0.0141  | 0.0453 | 0.0526 | 0.0742 | 0.0617 | 0.0372 |
| Glycerophospholipids             | Glycerophosphoinositols              | PI(22:6(4Z,7Z,10Z,13Z,16Z,19Z)/0:0)             | 0.0104  | 0.0241 | 0.0396 | 0.0744 | 0.0698 | 0.0791 |
| Glycerophospholipids             | Glycerophosphoserines                | PS(18:1(9Z)/0:0)                                | 0.4566  | 0.1999 | 0.2148 | 0.2628 | 0.3942 | 0.2546 |
| Glycerophospholipids             | Glycerophosphoserines                | PS(19:1(9Z)/0:0)                                | 0.2165  | 0.4532 | 0.3784 | 0.4265 | 0.4649 | 0.3565 |
| Glycerophospholipids             | Glycerophosphoserines                | PS(20:4(5Z,8Z,11Z,14Z)/20:5(5Z,8Z,11Z,14Z,17Z)) | 0.0863  | 0.0730 | 0.0608 | 0.0514 | 0.0545 | 0.0240 |
| Glycerophospholipids             | Glycerophosphoserines                | PS(O-18:0/15:1(9Z))                             | 0.0011  | 0.0477 | 0.0015 | 0.0005 | 0.0006 | 0.0005 |
| Glycerophospholipids             | Glycerophosphocholines               | Butenoyl PAF                                    | 0.4231  | 0.5172 | 0.2435 | 0.2036 | 0.2099 | 0.2119 |
| Glycerophospholipids             | Glycerophosphocholines               | Lyso-PAF C-18                                   | 0.3046  | 0.2928 | 0.3347 | 0.4124 | 0.5134 | 0.6724 |
| Glycerophospholipids             | Glycerophosphoglycerols              | glycero-3-phospho-(1'-sn-glycerol)              | 0.1908  | 0.3829 | 0.4554 | 0.5407 | 0.5947 | 0.5801 |
| Glycerophospholipids             | Glycerophosphoinositols              | 1-Arachidonoylglycerophosphoinositol            | 0.3921  | 0.4662 | 0.6175 | 0.7660 | 0.8321 | 0.7761 |
| Glycerophospholipids             | Glycerophosphoserines                | 1-Stearoylglycerophosphoserine                  | 0.1218  | 0.0579 | 0.0651 | 0.0763 | 0.1103 | 0.0706 |
| Carboxylic acids and derivatives | Amino acids, peptides, and analogues | S-(2-carboxypropyl)-Cysteamine                  | 0.2356  | 0.1409 | 0.1321 | 0.1631 | 0.1703 | 0.1110 |
| Carboxylic acids and derivatives | Amino acids, peptides, and analogues | Cystathionine sulfoxide                         | 0.1620  | 0.0943 | 0.0161 | 0.0070 | 0.0043 | 0.0020 |
| Carboxylic acids and derivatives | Amino acids, peptides, and analogues | Alpha-N-Phenylacetyl-L-glutamine                | 0.2206  | 0.1530 | 0.0726 | 0.0609 | 0.0602 | 0.0667 |
| Carboxylic acids and derivatives | Amino acids, peptides, and analogues | Captopril                                       | 0.0026  | 0.0475 | 0.0630 | 0.0761 | 0.1077 | 0.0943 |
| Carboxylic acids and derivatives | Amino acids, peptides, and analogues | L-gamma-glutamyl-L-isoleucine                   | 0.7902  | 0.3677 | 0.3545 | 0.4632 | 0.5549 | 0.4644 |

|                                        |                                      |                                                  |        |        |        |        |        |        |
|----------------------------------------|--------------------------------------|--------------------------------------------------|--------|--------|--------|--------|--------|--------|
|                                        | analogues                            |                                                  |        |        |        |        |        |        |
| Carboxylic acids and derivatives       | Amino acids, peptides, and analogues | Tyrosyl-Hydroxyproline                           | 0.7240 | 0.4158 | 0.3286 | 0.3380 | 0.3695 | 0.3234 |
| Carboxylic acids and derivatives       | Amino acids, peptides, and analogues | Tranexamic Acid                                  | 0.1579 | 0.0821 | 0.0757 | 0.0971 | 0.1135 | 0.0753 |
| Carboxylic acids and derivatives       | Amino acids, peptides, and analogues | Capryloylglycine                                 | 0.0432 | 0.0492 | 0.0806 | 0.0936 | 0.0737 | 0.1007 |
| Carboxylic acids and derivatives       | Amino acids, peptides, and analogues | Histidinyl-Lysine                                | 0.0265 | 0.0935 | 0.1580 | 0.1818 | 0.1843 | 0.1266 |
| Carboxylic acids and derivatives       | Amino acids, peptides, and analogues | L-cysteine Hydrochloride                         | 0.3740 | 0.4579 | 0.4443 | 0.3100 | 0.2544 | 0.1837 |
| Carboxylic acids and derivatives       | Amino acids, peptides, and analogues | N-Acetyl-D-phenylalanine                         | 0.1389 | 0.0920 | 0.0569 | 0.0765 | 0.0831 | 0.0759 |
| Carboxylic acids and derivatives       | Carboxylic acid derivatives          | Dihydroceramide                                  | 0.2298 | 0.1390 | 0.1481 | 0.1604 | 0.1463 | 0.1147 |
| Carboxylic acids and derivatives       | Tricarboxylic acids and derivatives  | Garcinia lactone dibutyl ester                   | 0.0200 | 0.0090 | 0.0507 | 0.0831 | 0.0722 | 0.0626 |
| Steroids and steroid derivatives       | Androstane steroids                  | Androstenol                                      | 0.0016 | 0.0647 | 0.0210 | 0.0101 | 0.0085 | 0.0062 |
| Steroids and steroid derivatives       | Bile acids, alcohols and derivatives | Sulfolithocholyglycine                           | 1.2333 | 0.7075 | 0.3887 | 0.3697 | 0.2621 | 0.2505 |
| Steroids and steroid derivatives       | Bile acids, alcohols and derivatives | Tauroursodeoxycholic acid                        | 0.2556 | 0.0493 | 0.0592 | 0.0862 | 0.0815 | 0.0780 |
| Steroids and steroid derivatives       | Bile acids, alcohols and derivatives | Lithocholyltaurine                               | 0.1336 | 0.0553 | 0.2218 | 0.4841 | 0.4094 | 0.9043 |
| Steroids and steroid derivatives       | Bile acids, alcohols and derivatives | 7 alpha-Hydroxy-3-oxo-4-cholestenoate            | 0.5142 | 1.4790 | 0.2899 | 0.1737 | 0.0859 | 0.0761 |
| Steroids and steroid derivatives       | Bile acids, alcohols and derivatives | N-oleoyl taurine                                 | 0.0037 | 0.0345 | 0.0307 | 0.0248 | 0.0302 | 0.0252 |
| Steroids and steroid derivatives       | Vitamin D and derivatives            | 24-Hydroxycalcitriol                             | 0.0805 | 0.1742 | 0.0267 | 0.0206 | 0.0208 | 0.0177 |
| Sphingolipids                          | Phosphosphingolipids                 | SM(d17:1/17:0)                                   | 2.8133 | 3.0049 | 3.8691 | 4.1575 | 4.3908 | 5.6315 |
| Sphingolipids                          | Sphingoid bases                      | Sphingofungin B                                  | 0.0368 | 0.1381 | 0.0529 | 0.0251 | 0.0207 | 0.0275 |
| Organic sulfuric acids and derivatives | Arylsulfates                         | O-methoxycatechol-O-sulphate                     | 0.0079 | 0.0374 | 0.0354 | 0.0800 | 0.0468 | 0.0890 |
| Organic sulfuric acids and derivatives | Arylsulfates                         | Pyrocatechol sulfate                             | 0.8954 | 0.4451 | 0.0889 | 0.1128 | 0.0462 | 0.0869 |
| Organic sulfuric acids and derivatives | Arylsulfates                         | 2-methoxyacetaminophen sulfate                   | 0.0647 | 0.3513 | 0.2025 | 0.0418 | 0.0256 | 0.0222 |
| Organic sulfuric acids and derivatives | Arylsulfates                         | 4-vinylphenol Sulfate                            | 0.1349 | 0.0096 | 0.0019 | 0.0034 | 0.0011 | 0.0042 |
| Organic sulfuric acids and derivatives | Arylsulfates                         | 4-ethylphenylsulfate                             | 0.9046 | 0.2864 | 0.0409 | 0.0847 | 0.0295 | 0.0444 |
| Organic sulfuric acids and derivatives | Arylsulfates                         | Indoxylsulfuric acid                             | 0.3151 | 0.1557 | 0.1387 | 0.3014 | 0.1900 | 0.2949 |
| Prenol lipids                          | Monoterpenoids                       | (4S,8R)-8,9-Dihydroxy-p-menth-1(6)-en-2-one      | 0.0728 | 0.0376 | 0.0298 | 0.0190 | 0.0215 | 0.0164 |
| Prenol lipids                          | Sesquiterpenoids                     | 3-Hydroxy-beta-ionone                            | 0.0254 | 0.1379 | 0.0798 | 0.0399 | 0.0334 | 0.0351 |
| Prenol lipids                          | Sesquiterpenoids                     | Capsidiol                                        | 0.0074 | 0.0812 | 0.0246 | 0.0070 | 0.0064 | 0.0042 |
| Prenol lipids                          | Sesquiterpenoids                     | Germacrenone                                     | 0.1059 | 0.4328 | 0.1363 | 0.0454 | 0.0473 | 0.0343 |
| Prenol lipids                          | Sesquiterpenoids                     | 4-(2,6,6-Trimethyl-1-cyclohexen-1-yl)-2-butanone | 0.0030 | 0.0381 | 0.0401 | 0.0296 | 0.0344 | 0.0248 |

|                                     |                                           |                                                                               |        |        |        |        |        |        |
|-------------------------------------|-------------------------------------------|-------------------------------------------------------------------------------|--------|--------|--------|--------|--------|--------|
| Prenol lipids                       | Sesquiterpenoids                          | 7,8-Dehydro-3,4-dihydro-beta-ionol                                            | 0.0029 | 0.0909 | 0.0626 | 0.0362 | 0.0402 | 0.0315 |
| Organooxygen compounds              | Alcohols and polyols                      | Isokobusone                                                                   | 0.0084 | 0.0459 | 0.0100 | 0.0043 | 0.0022 | 0.0026 |
| Organooxygen compounds              | Carbohydrates and carbohydrate conjugates | Galactitol                                                                    | 0.2103 | 0.1264 | 0.0350 | 0.0255 | 0.0227 | 0.0174 |
| Organooxygen compounds              | Carbohydrates and carbohydrate conjugates | (x)-1,2-Propanediol 1-O-b-D-glucopyranoside                                   | 0.0375 | 0.0529 | 0.0687 | 0.0885 | 0.1291 | 0.1017 |
| Organooxygen compounds              | Carbohydrates and carbohydrate conjugates | N-Acetylmuramoyl-Ala                                                          | 0.0080 | 0.0142 | 0.0279 | 0.0378 | 0.0621 | 0.0245 |
| Organooxygen compounds              | Carbonyl compounds                        | 2-Thiophenecarboxaldehyde                                                     | 0.0536 | 0.0893 | 0.1183 | 0.1414 | 0.1649 | 0.1488 |
| Organooxygen compounds              | Carbonyl compounds                        | 10beta-12,13-Dinor-8-oxo-6-eremophilen-11-al                                  | 0.0207 | 0.0725 | 0.0452 | 0.0246 | 0.0127 | 0.0097 |
| Organooxygen compounds              | Ethers                                    | (2Z,4'Z)-2-(5-Methylthio-4-penten-2-ynylidene)-1,6-dioxaspiro[4.4]non-3-ene   | 0.0430 | 0.0562 | 0.0965 | 0.1055 | 0.1329 | 0.0993 |
| Indoles and derivatives             | Indolecarboxylic acids and derivatives    | Indole-3-carboxylic acid-O-sulphate                                           | 0.0228 | 0.0918 | 0.0214 | 0.0149 | 0.0059 | 0.0041 |
| Indoles and derivatives             | Indolines                                 | 3-Hydroxymelatonin                                                            | 0.0871 | 0.0069 | 0.0002 | 0.0004 | 0.0002 | 0.0085 |
| Indoles and derivatives             | Indolyl carboxylic acids and derivatives  | Indolelactic acid                                                             | 0.1346 | 0.0771 | 0.0629 | 0.0491 | 0.0531 | 0.0573 |
| Indoles and derivatives             | Tryptamines and derivatives               | Oleoyl Serotonin                                                              | 0.1959 | 0.0886 | 0.0465 | 0.0464 | 0.0492 | 0.0377 |
| Benzene and substituted derivatives | Benzoic acids and derivatives             | Vanilloylglycine                                                              | 0.2002 | 0.1999 | 0.0462 | 0.0300 | 0.0202 | 0.0435 |
| Benzene and substituted derivatives | Halobenzenes                              | Lofexidine                                                                    | 0.0274 | 0.0451 | 0.0704 | 0.0811 | 0.1071 | 0.0885 |
| Benzene and substituted derivatives | Phenylpropanes                            | Probulcol                                                                     | 0.7433 | 0.2852 | 0.3268 | 0.4634 | 0.3101 | 0.2780 |
| Dibenzocycloheptenes                | Unclassified                              | Desmethylnortriptyline                                                        | 0.4736 | 0.2512 | 0.1397 | 0.1948 | 0.1498 | 0.0675 |
| Carboximidic acids and derivatives  | Carboximidic acids                        | Hexamethylene bisacetamide                                                    | 0.0254 | 0.0261 | 0.0316 | 0.0301 | 0.0261 | 0.1303 |
| Phenols                             | 1-hydroxy-2-unsubstituted benzenoids      | 6,7-Dihydro-4-(hydroxymethyl)-2-(p-hydroxyphenethyl)-7-methyl-5H-2-pyridinium | 0.0472 | 0.0980 | 0.0500 | 0.0438 | 0.0465 | 0.0483 |
| Phenols                             | 4-alkoxyphenols                           | 4-Hydroxyatomoxetine                                                          | 0.0114 | 0.0414 | 0.0123 | 0.0197 | 0.0175 | 0.0205 |
| Glycerolipids                       | Diradylglycerols                          | 1-(14-methyl-pentadecanoyl)-2-(8-[3]-ladderane-octanyl)-sn-glycerol           | 0.1448 | 0.0487 | 0.0867 | 0.1146 | 0.1436 | 0.1228 |
| Glycerolipids                       | Diradylglycerols                          | DG(22:5(4Z,7Z,10Z,13Z,16Z)/22:6(4Z,7Z,10Z,13Z,16Z,19Z)/0:0)                   | 2.4752 | 2.3138 | 1.2039 | 0.9026 | 0.7894 | 0.6369 |
| Hydroxy acids and derivatives       | Beta hydroxy acids and derivatives        | 3-hydroxy-3-(3-hydroxyphenyl)propanoic acid-O-sulphate                        | 0.0265 | 0.0027 | 0.0010 | 0.0009 | 0.0010 | 0.0011 |
| Benzopyrans                         | 1-benzopyrans                             | Artonol E                                                                     | 0.0661 | 0.0915 | 0.1258 | 0.1773 | 0.2056 | 0.1919 |
| Benzopyrazoles                      | Indazoles                                 | Nigellidine                                                                   | 0.1566 | 0.0784 | 0.0076 | 0.0108 | 0.0011 | 0.0102 |
| Benzothiophenes                     | Dibenzothiophenes                         | 4-Methyldibenzothiophene                                                      | 0.1004 | 0.0871 | 0.1232 | 0.1777 | 0.2174 | 0.1905 |
| Benzoxazepines                      | Dibenzoxazepines                          | Amoxapine                                                                     | 0.0008 | 0.0392 | 0.1067 | 0.0980 | 0.1390 | 0.0744 |

|                                |                                       |                                           |        |        |        |        |        |        |
|--------------------------------|---------------------------------------|-------------------------------------------|--------|--------|--------|--------|--------|--------|
| Dihydrofurans                  | Furanones                             | Ascorbic acid-2-sulfate                   | 0.0864 | 0.1706 | 0.1879 | 0.1561 | 0.2078 | 0.1264 |
| Naphthofurans                  | Unclassified                          | 2,3-Secoporrigenin                        | 0.0106 | 0.0369 | 0.0508 | 0.0391 | 0.0356 | 0.0124 |
| Naphthopyrans                  | Unclassified                          | Janthitrem B                              | 0.0837 | 0.1811 | 0.1332 | 0.1414 | 0.1116 | 0.0546 |
| Pyrans                         | Pyranones and derivatives             | Erinapyrone C                             | 0.1006 | 0.0191 | 0.0609 | 0.0972 | 0.0824 | 0.0912 |
| Pyrrolidines                   | N-alkylpyrrolidines                   | N-(3-acetamidopropyl)pyrrolidin-2-one     | 0.1501 | 0.1262 | 0.1866 | 0.2435 | 0.2754 | 0.3067 |
| Pyrrolopyrazines               | Cyclopyrrolones                       | Eszopiclone                               | 0.0171 | 0.0459 | 0.0210 | 0.0195 | 0.0195 | 0.0178 |
| Quinolines and derivatives     | Benzoquinolines                       | Acrimarine J                              | 0.2563 | 0.0922 | 0.1065 | 0.0723 | 0.0472 | 0.0166 |
| Quinolines and derivatives     | Benzoquinolines                       | Neoacrimarine A                           | 0.1395 | 0.1634 | 0.0921 | 0.0608 | 0.0464 | 0.0355 |
| Tetrahydrofurans               | Unclassified                          | Riesling acetal                           | 0.0120 | 0.0434 | 0.0208 | 0.0055 | 0.0083 | 0.0066 |
| Alcohols and polyols           | Secondary alcohols                    | 8-Hydroxy-4(6)-lactarene-5,14-diol        | 0.0333 | 0.0950 | 0.0433 | 0.0268 | 0.0313 | 0.0281 |
| Cinnamic acids and derivatives | Hydroxycinnamic acids and derivatives | Ferulic acid 4-sulfate                    | 0.3596 | 0.0467 | 0.0192 | 0.0137 | 0.0153 | 0.0263 |
| Coumarins and derivatives      | Hydroxycoumarins                      | 8-Hydroxy-7-methoxy-2H-1-benzopyran-2-one | 0.0275 | 0.0011 | 0.0002 | 0.0001 | 0.0001 | 0.0019 |
| Coumarins and derivatives      | Pyranocoumarins                       | Clausarinol                               | 0.0398 | 0.0146 | 0.0229 | 0.0373 | 0.0481 | 0.0516 |
| Flavonoids                     | Flavones                              | Apigenin 7-sulfate                        | 1.2303 | 0.4611 | 0.2820 | 0.2189 | 0.1609 | 0.1662 |
| Flavonoids                     | Flavonoid glycosides                  | Naringenin 4'-O-glucuronide               | 0.0903 | 0.0227 | 0.0060 | 0.0032 | 0.0004 | 0.0007 |
| Flavonoids                     | Flavonoid glycosides                  | Pelargonidin 3-sophoroside                | 0.0718 | 0.0245 | 0.0341 | 0.0478 | 0.0465 | 0.0570 |
| Flavonoids                     | Pyranoflavonoids                      | Cudraflavone A                            | 0.1037 | 0.1381 | 0.1341 | 0.1408 | 0.2273 | 0.2101 |
| Linear 1,3-diarylpropanoids    | Chalcones and dihydrochalcones        | Dihydronaringenin-O-sulphate              | 0.4938 | 0.1170 | 0.0348 | 0.0411 | 0.0116 | 0.0108 |
| Phenylpropanoic acids          | Unclassified                          | Thiophene-4,5-epoxide                     | 0.3782 | 0.3205 | 0.0764 | 0.1716 | 0.0317 | 0.0415 |
| Unclassified                   | Unclassified                          | alpha-Tubulin                             | 0.0540 | 0.1170 | 0.0761 | 0.0622 | 0.0544 | 0.0512 |
| Unclassified                   | Unclassified                          | 2,7(14)-Illudadiene-10,15-diol            | 0.0038 | 0.0863 | 0.0263 | 0.0073 | 0.0050 | 0.0042 |

Note: Group difference were analyzed by ANOVA. Metabolites that highly significantly enhanced ( $P < 0.01$ ) were colored red and significantly enhanced ( $0.01 < P < 0.05$ ) were colored pink, while metabolites highly significantly decreased ( $P < 0.01$ ) colored blue and significantly decreased ( $0.01 < P < 0.05$ ) were colored wathet, compared to the non-fasting group.
